# Supplementary material
Source: PubMed Central journal article supplement (PMC10754396)
Supplement: CJHP-77-1-3433-s001.pdf [file CJHP-77-1-3433-s001.pdf]

## Supplement 1: Survey questions.

### A) Participant Screening

1. Are you a pharmacist currently practicing in a hospital setting?

- Yes
  - Continue to question 1.1
- No
  - Thank you for your interest → End of survey

1.1 Do you provide clinical services to patients at your site?

- Yes
  - Continue to question 1.2
- No
  - Thank you for your interest → End of survey

1.2 In your clinical practice, are you involved in the discharge process for your patients?

- Yes
  - Continue to question 1.2
- No
  - Thank you for your interest → End of survey

2. The following questions refer to the time spent while on clinical:

2.1 What proportion of your time during the day do you spend on clinical responsibilities?

- <25%
- 25 to <50%
- 50 to <75%
- 75 to <100%
- 100%

2.2 What proportion of your time during the day do you spend on discharge related activities?

- <25%
- 25 to <50%
- 50 to <75%
- 75 to <100%
- 100%

2.3 Of the time you spend during the day on discharge related activities, how much of it includes direct (i.e. face-to-face) contact with patients? \_\_\_\_ minutes

### B) Current involvement of pharmacists at discharge

1. On average, for what **PERCENT** of your patients do you provide **ANY** discharge interventions?

0% ----- 100%

2. In a given week, for what **PERCENT OF PATIENTS** do you perform each of the following discharge interventions?

- Addressing cost concerns (e.g., arranging special authority, registration for Fair PharmaCare)  
0% ----- 100%
- Ensuring medication adherence (e.g., medication delivery, compliance packing, witness administration, daily/weekly dispense, medication calendar)  
0% ----- 100%
- Communicating the medication plan with community care providers (e.g., community pharmacy, family physicians, specialist, nurse practitioners)  
0% ----- 100%
- Coordinating care with interdisciplinary team (e.g., MRP, Nurse, Social Worker)  
0% ----- 100%
- Medication reconciliation on **ADMISSION**  
0% ----- 100%
- Medication reconciliation on **DISCHARGE**  
0% ----- 100%
- Patient medication education (e.g., counselling, written information, picture of pills)  
0% ----- 100%
- Pharmacist completes/writes discharge prescription  
0% ----- 100%
- Pharmacist reviews discharge prescription  
0% ----- 100%
- Post-discharge follow-up by phone  
0% ----- 100%
- Providing patients with a physical supply of medication before leaving the hospital  
0% ----- 100%
- Other discharge interventions that are performed and for what percent of patients:  
\_\_\_\_\_

3. When you are unable to perform any one of these interventions for 100% of your patients, what factors are the most important in prioritizing which patients should receive a discharge intervention? Rank the following options in order from most to least important (1 being most important and 6 or 7 being least important):

- Complexity of medical condition(s)
- High number of medication changes
- Hospital admission due to adverse drug reaction
- New medical diagnosis
- Ongoing therapy with high-risk medication (i.e., medications with a narrow therapeutic index and/or requiring frequent monitoring)
- Patients who require assistance with medication management or administration at home
- Other: \_\_\_\_\_

Barriers to performing discharge interventions

4. Rank the following list in order from the most to the least important barrier to pharmacist-led optimization of patient discharges (1 being most important and 7 or 8 being least important):

- Other competing clinical duties
- Discharge planning is not a priority in my practice setting

**Supplement to:** Rahnama K, Dahri K, Legal M, Inglis C. Characterizing current and optimal involvement of hospital pharmacists in the discharge process: a survey of pharmacists in British Columbia.

- Lack of resources/staffing (e.g., high patient to clinical pharmacist ratio, no pharmacist coverage during weekends)
- Limited pharmacist scope of practice (e.g., not being able to authorize the discharge prescription)
- Patient-specific barriers (e.g., language barriers, not having a fixed address or a reliable phone number)
- Time constrains
- Lack of timely notification of discharge (e.g., <24 hours in advance)
- Other: \_\_\_\_\_

**C) Requirements for a successful discharge**

Discharge interventions

1. From the following list, rank the top five interventions that you feel are required for a successful discharge in order of most to least important (1 being most important and 5 being least important):

- Addressing cost concerns (e.g., arranging special authority, registration for Fair PharmaCare)
- Ensuring medication adherence (e.g., medication delivery, compliance packing, witness administration, daily/weekly dispense, medication calendar)
- Communicating the medication plan with community care providers (e.g., community pharmacy, GP, specialist, NP)
- Coordinating care with interdisciplinary team
- Medication reconciliation on **ADMISSION**
- Medication reconciliation on **DISCHARGE**
- Patient medication education (e.g., counselling, written information, picture of pills)
- Pharmacist completes/writes discharge prescription
- Pharmacist reviews discharge prescription
- Post-discharge follow-up by phone
- Providing patients with a physical supply of medication before leaving the hospital

2. In an **ideal setting with unlimited resources**, assess the interventions below and for each assign a score between 1 and 10 with regards to their importance for creating a successful discharge: (10 being extremely important and 1 being not important)

| Discharge Intervention                                          | Score         |   |   |   |   |                     |   |   |   |    |
|-----------------------------------------------------------------|---------------|---|---|---|---|---------------------|---|---|---|----|
|                                                                 | Not important |   |   |   |   | Extremely Important |   |   |   |    |
|                                                                 | 1             | 2 | 3 | 4 | 5 | 6                   | 7 | 8 | 9 | 10 |
| Addressing medication cost concerns                             |               |   |   |   |   |                     |   |   |   |    |
| Ensuring medication adherence                                   |               |   |   |   |   |                     |   |   |   |    |
| Communicating the medication plan with community care providers |               |   |   |   |   |                     |   |   |   |    |
| Coordinating care with interdisciplinary team                   |               |   |   |   |   |                     |   |   |   |    |

|                                                                                     |  |  |  |  |  |  |  |  |  |  |
|-------------------------------------------------------------------------------------|--|--|--|--|--|--|--|--|--|--|
| Medication reconciliation on ADMISSION                                              |  |  |  |  |  |  |  |  |  |  |
| Medication reconciliation on DISCHARGE                                              |  |  |  |  |  |  |  |  |  |  |
| Patient medication education                                                        |  |  |  |  |  |  |  |  |  |  |
| <u>Pharmacist</u> completes/writes discharge prescription                           |  |  |  |  |  |  |  |  |  |  |
| <u>Pharmacist</u> reviews discharge prescription                                    |  |  |  |  |  |  |  |  |  |  |
| Post-discharge follow-up by phone                                                   |  |  |  |  |  |  |  |  |  |  |
| Providing patients with a physical supply of medication before leaving the hospital |  |  |  |  |  |  |  |  |  |  |
| Other: _____                                                                        |  |  |  |  |  |  |  |  |  |  |

Healthcare team member involvement

3. Select the team member(s) that should optimally complete each discharge intervention:

|                                                                 | <b>Physician</b> | <b>Pharmacist</b> | <b>Registered Pharmacy Technician</b> | <b>Nurse</b> | <b>Social Worker</b> | <b>Not currently done at my site</b> | <b>Other</b> |
|-----------------------------------------------------------------|------------------|-------------------|---------------------------------------|--------------|----------------------|--------------------------------------|--------------|
| Addressing medication cost concerns                             |                  |                   |                                       |              |                      |                                      |              |
| Ensuring medication adherence                                   |                  |                   |                                       |              |                      |                                      |              |
| Communicating the medication plan with community care providers |                  |                   |                                       |              |                      |                                      |              |
| Completing/writing the discharge prescription                   |                  |                   |                                       |              |                      |                                      |              |

|                                                                                     |  |  |  |  |  |  |  |
|-------------------------------------------------------------------------------------|--|--|--|--|--|--|--|
| Coordinating care with interdisciplinary team                                       |  |  |  |  |  |  |  |
| Medication reconciliation on ADMISSION                                              |  |  |  |  |  |  |  |
| Medication reconciliation on DISCHARGE                                              |  |  |  |  |  |  |  |
| Patient medication education                                                        |  |  |  |  |  |  |  |
| Post-discharge follow-up by phone                                                   |  |  |  |  |  |  |  |
| Providing patients with a physical supply of medication before leaving the hospital |  |  |  |  |  |  |  |

If selected other please specify: \_\_\_\_\_

**D) Solutions for optimizing the patient discharge process**

1. To what extent do you agree with the implementation of each of the following strategies to ensure optimal patient discharge?

|                                                                                                                      |                            |          |
|----------------------------------------------------------------------------------------------------------------------|----------------------------|----------|
| Improved pharmacy staffing ratios to allow pharmacists to be actively involved in a greater proportion of discharges |                            |          |
| Agree                                                                                                                | Neither agree nor disagree | Disagree |
| Dedicated discharge planning pharmacists                                                                             |                            |          |
| Agree                                                                                                                | Neither agree nor disagree | Disagree |
| Dedicated pharmacy technician(s) to facilitate components of discharge medication plan                               |                            |          |
| Agree                                                                                                                | Neither agree nor disagree | Disagree |
| Pharmacist prescribing                                                                                               |                            |          |
| Agree                                                                                                                | Neither agree nor disagree | Disagree |
| Seven day per week clinical pharmacist coverage                                                                      |                            |          |

| Agree                                                          | Neither agree nor disagree | Disagree |
|----------------------------------------------------------------|----------------------------|----------|
| Timely notification of discharge ( $\geq 24$ hours in advance) |                            |          |
| Agree                                                          | Neither agree nor disagree | Disagree |

Other: \_\_\_\_\_

2. To what extent do you agree with the implementation of each of the following strategies to ensure optimal **communication** of pharmacist's knowledge of the patient's medication plan on discharge?

| Providing a pharmacist dictated discharge summary to the patient's community care providers     |                            |          |
|-------------------------------------------------------------------------------------------------|----------------------------|----------|
| Agree                                                                                           | Neither agree nor disagree | Disagree |
| Providing <b>the patient</b> with a medication focused care plan on discharge                   |                            |          |
| Agree                                                                                           | Neither agree nor disagree | Disagree |
| Follow up call to the patient's community pharmacy                                              |                            |          |
| Agree                                                                                           | Neither agree nor disagree | Disagree |
| Healthcare teams in hospital and community having access to a unified electronic medical record |                            |          |
| Agree                                                                                           | Neither agree nor disagree | Disagree |

What other strategies do you suggest to improve the communication of the medication plan on discharge:

\_\_\_\_\_

2.1 If a pharmacist dictated discharge summary was created, which member(s) of the patient's care team in the community should receive this communication? (Select all that apply)

- Community Pharmacist
- Family Physician
- Nurse Practitioner
- Primary Care Clinical Pharmacist
- Specialist(s)
- Other: \_\_\_\_\_

3. Would a discharge checklist or guidance document around best practices be useful for your practice?

- Yes
- No

### E) Demographics

1. What is your highest level of education/training?

- Bachelor of Science in Pharmacy (e.g., BScPharm, BSP)
- Entry-to-practice Doctor of Pharmacy (e.g., E2P PharmD)
- Accredited Canadian Pharmacy Residency year 1
- Accredited Canadian Pharmacy Residency year 2
- Post-graduate Doctor of Pharmacy

**Supplement to:** Rahnama K, Dahri K, Legal M, Inglis C. Characterizing current and optimal involvement of hospital pharmacists in the discharge process: a survey of pharmacists in British Columbia.  
*Can J Hosp Pharm.* 2024;77(1):e3433. doi: 10.4212/cjhp.3433

- Fellowship training
- Others: \_\_\_\_\_

2. How long have you been practicing for?

- Less than 5 years
- 5-10 years
- 11-15 years
- 16-20 years
- More than 20 years

3. Which Health Authority do you currently practice in?

- Fraser Health
- Interior Health
- Northern Health
- Providence Health Care
- PHSA (C&W or BC Cancer Agency)
- Vancouver Coastal Health
- Vancouver Island Health

4. Approximately, how many beds does your current place of practice have? \_\_\_\_\_

5. What type of a setting are you practicing in?

- Community hospital
- Tertiary hospital
- Long term care
- Other: \_\_\_\_\_

6. What is the usual pharmacist-to-patient ratio in your regular clinical practice? \_\_\_\_\_
